# Supplementary material for: Cordyceps cateniannulata, a new potential strain for controlling Allantus luctifer from China
Source: PeerJ journal article supplement (doi:10.7717/peerj.18345), 2024-10-29
Supplement: Fig3Fig5deaths.xlsx [file Fig3Fig5deaths.xlsx]

## Sheet: Different EPFs 
Code in paper	Strains of Latin Name	Total deaths after 10 days		Strain	Mortality Rate of the different instars larvae of A. luctifer %	Standard error	Significance
1	Cordyceps cateniannulata	11		1	55	0	bcd
		11		2	41.6667	2.88675	ef
		11		3	53.3333	2.88675	cd
2	C． farinosa	9		4	46.6667	2.88675	def
		8		5	65	5	b
		8		6	48.3333	7.63763	def
3	C． fumosorosea	11		7	51.6667	2.88675	de
		11		8	63.3333	5.7735	bc
		10		9	40	0	f
4	C． fumosorosea	9		10	76.6667	2.88675	a
		10
		9
5	C． cateniannulata	13
		12
		14
6	C． cateniannulata	10
		8
		11
7	C． cateniannulata	11
		10
		10
8	C． hepiali	14
		12
		12
9	C． cateniannulata	8
		8
		8
10	C． cateniannulata	15
		16
		15

## Sheet: Different experimental methods
Methods	Number	Mortality Rate of A. luctifer %			Methods	A1	Standard error	Significance	A2	Standard error	Significance
A1	6	30			24h Mortality	10	5	c	28.3333	2.88675	b
	7	35			48h Mortality	30	5	b	68.3333	5.7735	a
	5	25
A2	15	75
	13	65
	13	65

## Sheet: Different instars larvae 
Different instars larvae	Total deaths after 24 hours	Total deaths after 48 hours		Time/d	24 h Mortality	Standard error	Significance	48 h Mortality	Standard error	Significance
1	9	18		1	43.3333	2.88675	a	85	5	a
	9	17		2	36.6667	2.88675	b	70	5	b
	8	16		3	30	0	c	63.3333	5.7735	bc
2	8	14		4	30	0	c	58.3333	2.88675	c
	7	15		5	0	0	d	15	0	d
	7	13		6	0	0		0	0
3	6	14
	6	12
	6	12
4	6	12
	6	12
	6	11
5	0	3
	0	3
	0	3
6	0	0
	0	0
	0	0
